# Supplementary material
Source: PubMed Central journal article supplement (PMC3890800)
Supplement: 1319138111_pnas.201319138SI.pdf [file 1319138111_pnas.201319138SI.pdf]

# Supporting Information

Lu et al. 10.1073/pnas.1319138111

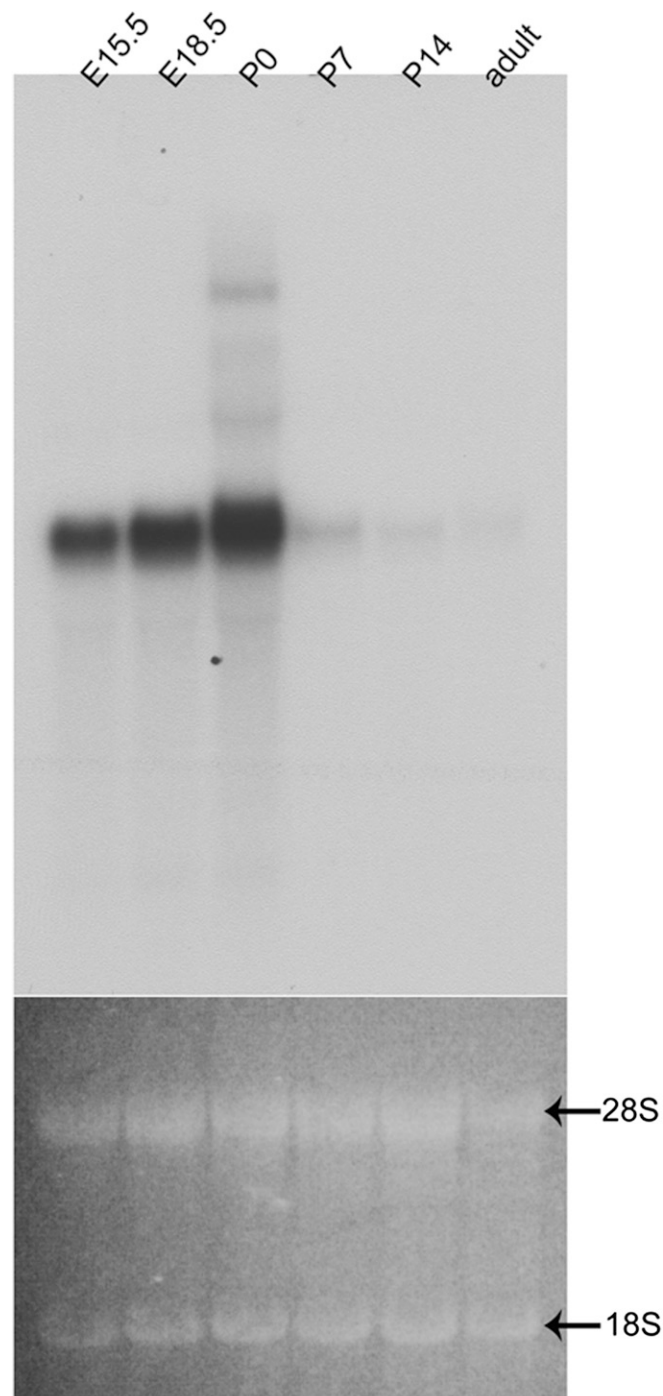

**Fig. S1.** Developmental expression profile of striatal *Is1* mRNA. (*Upper*) Northern blotting shows that *Is1* mRNA is progressively expressed at a high level in the striatum from embryonic day (E) 15.5 to postnatal day (P) 0. *Is1* mRNA is dramatically reduced at P7, P14, and adulthood (black bands). (*Lower*) Ribosomal RNA of loading controls (28S, 18S) is shown (arrows).







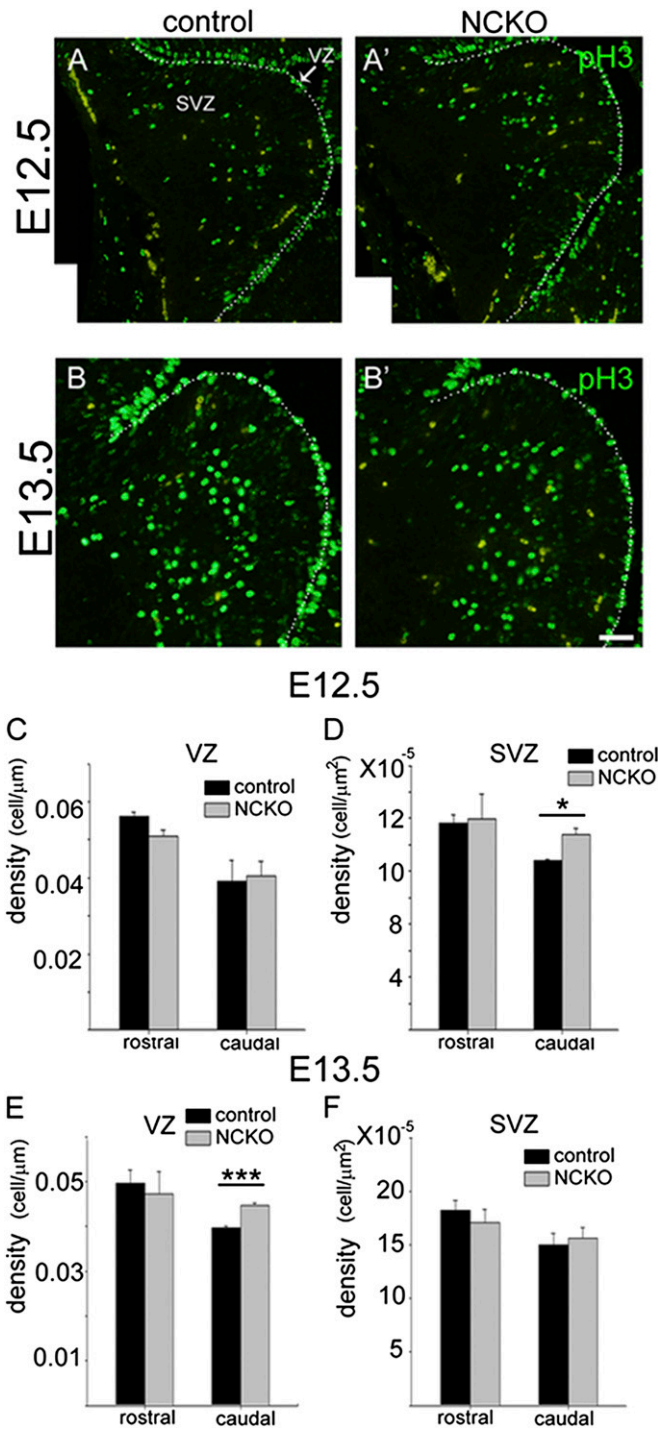

**Fig. 57.** Slight increases of phosphohistone 3<sup>+</sup> (pH3<sup>+</sup>) mitotic cells in the germinal zones of *Isl1* mutant striatal anlage. Immunostaining of pH3 shows that scattered pH3<sup>+</sup> mitotic cells are distributed in the ventricular zone (VZ, dashed lines along the lateral ventricle) and subventricular zone (SVZ) in control (A and B) and *Isl1* mutant (A' and B') brains at E12.5 (A and A') and E13.5 (B and B'). The density of pH3<sup>+</sup> cell number is not changed in rostral and caudal parts of E12.5 VZ (A, A' and C), but is slightly increased in the caudal parts of E12.5 SVZ (A, A', and D) and E13.5 VZ (B, B', and E) of mutant brains.  $n = 3$ . \* $P < 0.05$ ; \*\*\* $P < 0.001$ . (Scale bar: A–B', 50  $\mu\text{m}$ .)

E13.5 *in utero* electroporation :: E15.5 analysis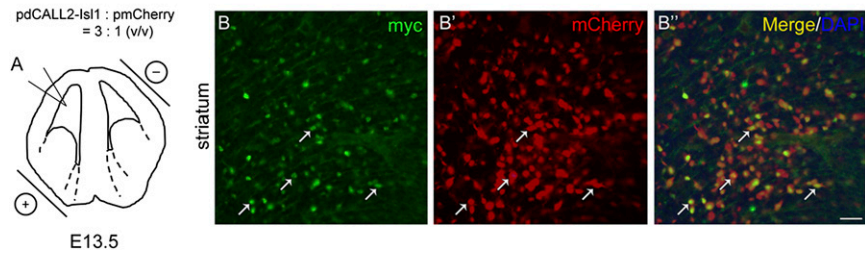

**Fig. 58.** Coelectroporation of pdCALL2-myc-*Isl1* and pCAG-mCherry plasmids into embryonic striatum by *in utero* electroporation. (A) pdCALL2-myc-*Isl1* plasmid was mixed with pCAG-mCherry plasmid at a ratio of 3:1 (vol/vol). The mixed plasmids were injected into the lateral ventricle of forebrains of E13.5 mouse embryos. The electrodes were held with angles of 45° and the anode facing the ventral telencephalons. (B) Electroporated brains were analyzed at E15.5 for the expression of pdCALL2-myc-*Isl1* by myc immunostaining. Merged images (B'') show that almost all mCherry<sup>+</sup> cells (B', arrows) coexpress myc-*Isl1* (B, arrows) in the electroporated striatum. (Scale bar: B–B'', 50 μm.)
